# Supplementary material for: Mussel-inspired coatings with tunable wettability, for enhanced antibacterial efficiency and reduced bacterial adhesion
Source: Royal Society of Chemistry journal article supplement (doi:10.1039/c9tb00534j), 2019-01-01
Supplement: c9tb00534j1.pdf [file c9tb00534j1.pdf]

## Supporting Information

### **Mussel-inspired coatings with tunable wettability, for enhanced antibacterial efficiency and reduced bacterial adhesion**

*Mingjun Li, ‡<sup>a</sup> Christoph Schlaich, ‡<sup>a</sup> Michaël W. Kulka,<sup>a</sup> Ievgen S. Donskyi,<sup>a,b</sup> Tanja*

*Schwerdtle,<sup>c</sup> Wolfgang E.S. Unger<sup>b</sup> and Rainer Haag<sup>\*a</sup>*

‡ These authors contributed equally.

\* Corresponding author - rainer.haag@gmx.de

<sup>a</sup> Institute of Chemistry and Biochemistry, Freie Universität Berlin, Takustrasse 3, 14195, Berlin, Germany

<sup>b</sup> BAM – Federal Institute for Material Science and Testing, Division of Surface Analysis and Interfacial Chemistry, Unter den Eichen 44-46, 12205 Berlin, Germany

<sup>c</sup> Institute of Nutritional Science, Department of Food Chemistry, University of Potsdam, Arthur-Scheunert-Allee 114-116, D-14558 Nuthetal, Germany

## 1. Synthetic approach

### 1.1 Synthesis of MI-dPG

The dendritic polyglycerol (dPG) with  $M_n=12.000 \text{ g}\cdot\text{mol}^{-1}$  and  $M_w=16.000 \text{ g}\cdot\text{mol}^{-1}$  was polymerized by a one-step ring-opening anionic polymerization (ROAP) as described in earlier publications.<sup>1, 2</sup> Amine-functionalized dPG (dPG-NH<sub>2</sub>) was prepared according to previously published procedures of our group.<sup>3</sup> 800 mg dPG-NH<sub>2</sub> (4 mmol) were dissolved in a mixture of MeOH and pH 4.8 2-(N-morpholino)ethanesulfonic acid (MES, 0.1 M) buffer (25 ml, 1v/1v). After addition of 1.11 g 3, 4-dihydroxyhydrocinnamic acid (DHHA, 6 mmol) and 0.93 g 1-ethyl-3-(3-dimethyl-aminopropyl) carbodiimid (EDC, 6 mmol), the solution was stirred for 16 h at room temperature. After removal of the solvent in vacuum, the final residue was dialyzed in MeOH for 4 days. For higher stability and better storage 37% HCl was added before drying the MI-dPG. <sup>1</sup>H NMR (500 MHz; CD<sub>3</sub>OD):  $\delta = 6.68\text{-}6.53$  (m, Ar); 4.21-3.02 (m, PG-backbone); 2.75 (m, COCH<sub>2</sub>CH<sub>2</sub>C); 2.52 (m, COCH<sub>2</sub>CH<sub>2</sub>C) ppm.

### 1.2 Synthesis of amine-functionalized linear polyglycerol (IPG-NH<sub>2</sub>)

**EEGE-*b*-AGE block-copolymer synthesis.** The synthesis was performed under the exclusion of air (i.e., argon atmosphere) and moisture, according to an adjusted version of the method published by Gervais et al.<sup>2</sup> EEGE monomer (19.2 ml, 18.43 g, 126.10 mmol) and triisobutylaluminium (1.8 ml, 1.41 mg, 7.13 mmol) were respectively added to a magnetically stirred solution of tetraoctylammonium bromide (543.0 mg, 0.99 mmol) in toluene (140 ml), and the resulting mixture was stirred for 4 hours at 0 °C. Subsequently, the AGE monomer (1.7 ml, 1.60 g, 14.02 mmol) and another equivalent of triisobutylaluminium were added. The mixture was then stirred for 16 hours, during which it warmed up to room temperature. Subsequently, the reaction was quenched with EtOH. The crude product was obtained as a

light gray-brown oil upon removal of the solvent under reduced pressure. Next, the crude mixture was redissolved in diethylether and centrifuged at 4000 rpm for 15 min, after which the supernatant was isolated and evaporated under reduced pressure. The pure product was obtained as a highly viscous white-gray oil (20.0 g, 0.95 mmol, > 99%), and was characterized by means of  $^1\text{H}$  and  $^{13}\text{C}$  NMR spectroscopy and GPC (DMF was used as mobile phase).

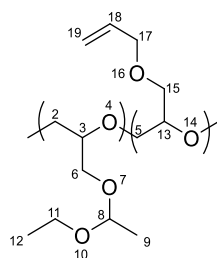

$^1\text{H}$  NMR [500 MHz,  $\delta$ (ppm),  $\text{CDCl}_3$ ]: 5.85 (**18**; m, 11  $^1\text{H}$ ,  $\text{H}_2\text{C}=\text{CH-R}$ ), 5.24 (**19**; d, 13  $^1\text{H}$ ,  $\text{H}_2\text{C}=\text{CH-R}$ ), 5.11 (**19**; d, 13  $^1\text{H}$ ,  $\text{H}_2\text{C}=\text{CH-R}$ ), 4.68-4.65 (**8**; q, 140  $^1\text{H}$ ,  $\text{CH}_3\text{CH}(\text{OR})_2$ ), 3.95 (**17**; d, 28  $^1\text{H}$ ,  $\text{H}_2\text{C}=\text{CCHO}$ ), 3.65-3.4 (**2, 3, 5, 6, 13, 15, 6** and **11**; m, 1100  $^1\text{H}$ ,  $-\text{RCHOR}$  and  $-\text{RCH}_2\text{OR}$ ), 1.26 (**9**; dd, 455  $^1\text{H}$ ,  $-\text{CH}_3$ ), 1.17 (**12**; t, 435  $^1\text{H}$ ,  $-\text{CH}_3$ ).

$^{13}\text{C}$  NMR [125.7 MHz,  $\delta$ (ppm),  $\text{CDCl}_3$ ]: 134.84 (**18**;  $\text{H}_2\text{C}=\text{CHR}$ ), 116.58 (**19**;  $-\text{RCH}=\text{CH}_2$ ), 99.79 (**8**;  $\text{CH}_3\text{CH}(\text{OR})_2$ ), 79-60 and 50.46 (**2, 3, 5, 6, 11, 13**, and **15**;  $-\text{RCH}_2\text{O}$ ), 72.20 (**17**;  $-\text{RCH}_2\text{O}$ ), as shown by combining NOSTY and COSY), 19.75 (**12**;  $\text{H}_3\text{CR}$ ), 15.26 (**9**;  $\text{CH}_3\text{C}(\text{OR})_2$ )

GPC [THF]: Monomodal size distribution with:  $M_n = 2.11 \cdot 10^4$  Da,  $M_w = 2.32 \cdot 10^4$  Da,  $M_w/M_n = 1.10$ .

**Acetal deprotection of the EEGE-*b*-AGE block-copolymer.** To a magnetically stirred solution of the EEGE-*b*-AGE block-copolymer (20 g, 0.86 mmol) in EtOH (100 ml), concentrated HCl-solution (10 ml, 37% in  $\text{H}_2\text{O}$ ) was added. The resulting reaction mixture was stirred for 19 hours at room temperature, after which NaOH-solution (1M) was added until a neutral pH was reached. The crude product was obtained upon evaporation of the solvent under

reduced pressure. The crude product was then redissolved in MeOH and purified by dialysis in MeOH (dialysis tubing with a molecular cutoff of 2 kDa was used). The pure product was obtained as a white oil (9 g, 0.73 mmol, 85%), upon the removal of the solvent under reduced pressure. Finally, the product was characterized by means of  $^1\text{H}$  and  $^{13}\text{C}$  NMR spectroscopy. Molecular size and weight distribution were analyzed by means of GPC.

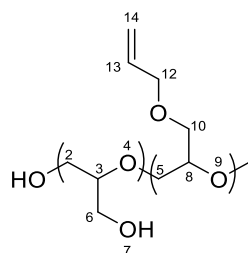

$^1\text{H}$  NMR [500 MHz,  $\delta$ (ppm),  $\text{CD}_3\text{OD}$ ]: 5.91 (**13**; m, 11  $^1\text{H}$ ,  $\text{H}_2\text{C}=\text{CH-R}$ ), 5.29 (**14**; d, 11  $^1\text{H}$ ,  $\text{H}_2\text{C}=\text{CH-R}$ ), 5.17 (**14**; d, 11  $^1\text{H}$ ,  $\text{H}_2\text{C}=\text{CH-R}$ ), 4.0 (**12**; d, 22  $^1\text{H}$ ,  $-\text{OCH}_2\text{CH}=\text{CH}_2$ , as shown by COSY), 3.75-3.45 (**2, 3, 5, 6, 8**, and **10**; m, 805  $^1\text{H}$ ,  $-\text{RCHOR}$  and  $-\text{RCH}_2\text{OR}$ ).

$^{13}\text{C}$  NMR [125.7 MHz,  $\delta$ (ppm),  $\text{CDCl}_3$ ]: 134.85 (**13**,  $\text{H}_2\text{C}=\text{CHR}$ ), 115.60 (**14**,  $\text{H}_2\text{C}=\text{CHR}$ ), 80.18, 69.19, and 61.23 (**2, 3, 5, 6, 8**, and **10**;  $\text{HOCH}_2\text{R}$ ), 72.19 (**12**;  $-\text{RCHO}$ -, as shown by combining NIOSY and COSY).

GPC [DMF]: Monomodal size distribution with:  $M_n = 1.03 \cdot 10^4$  Da,  $M_w = 1.26 \cdot 10^4$  Da,  $M_w/M_n = 1.23$ .

**Thiol-ene click chemistry of IPG-*b*-AGE and cysteamine.** To a magnetically stirred solution of the IPG-*b*-AGE block-copolymer (2.5 g, 0.20 mmol) in  $\text{H}_2\text{O}/\text{EtOH}$  (100 ml, 1:1), cysteamine hydrochloride (1.5 g, 13.6 mmol, 5 equivalents respectively to the allyl-double bonds of the AGE-block) and 2-hydroxy-1-(4-(2-hydroxyethyl) phenyl) -2-methylpropan-1-one (600 mg, 2.7 mmol) were added. The resulting reaction mixture was irradiated with UV-light (1 h). Subsequently, the product was purified by dialysis in  $\text{H}_2\text{O}$  (3x), followed by the removal of

the solvent by freeze-drying. The product was obtained as a yellow oil. The purified product was characterized with the help of  $^1\text{H}$  and  $^{13}\text{C}$  NMR spectroscopies, and GPC.

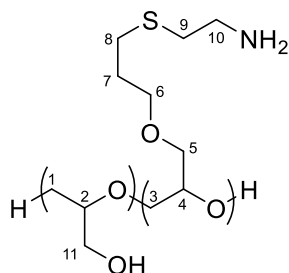

$^1\text{H}$  NMR [500 MHz,  $\delta$ (ppm),  $\text{D}_2\text{O}$ ]: 4.0-3.4 (**1**, **2**, **3**, **4**, **5**, **6**, and **11**; 827, m,  $^1\text{H}$ ,  $-\text{RCH}_2\text{OR}$ ), 3.18 (**10**; s, 15  $^1\text{H}$ ,  $-\text{RCH}_2\text{NH}_2$ ), 2.83 (**9**; s, 13  $^1\text{H}$ ,  $-\text{RSCH}_2\text{R}-$ ), 2.63 (**8**; s, 12  $^1\text{H}$ ,  $-\text{RCH}_2\text{SR}-$ ), 1.86 (**7**; s, 12  $^1\text{H}$ ,  $-\text{RCH}_2\text{R}-$ ).

$^{13}\text{C}$  NMR [125.7 MHz,  $\delta$ (ppm),  $\text{D}_2\text{O}$ ]: 79.97, 69.90, 69.16, 68.90, 60.89 (**1**, **2**, **3**, **4**, **5**, **6**, and **11**;  $-\text{RCH}_2\text{O}-$ ), 38.57 (**10**;  $-\text{RCH}_2\text{NH}_2$ ), 28.66 (**9**;  $-\text{RSCH}_2\text{R}-$ ), 28.37 (**8**;  $-\text{RCH}_2\text{SR}-$ ), 27.56 (**7**;  $-\text{RCH}_2\text{R}-$ ).

GPC [ $\text{H}_2\text{O}$ ]: Monomodal size distribution with:  $M_n = 1.13 \times 10^4$  Da,  $M_w = 1.49 \times 10^4$  Da,  $M_w/M_n = 1.32$

## 2. X-ray photoelectron spectroscopy (XPS)

The samples with different wettability coatings for XPS test were prepared on the surface of naturally oxidized silicon wafer ( $\text{SiO}_2$ ). The surface compositions were determined by XPS using a Kratos Axis Ultra DLD spectrometer equipped with a monochromatized Al  $K\alpha$  X-ray source at an analyzer pass energy of 80 eV for survey spectra. High-resolution core-level spectra were recorded in FAT (fixed analyzer transmission) mode at pass energy of 20 eV for O 1s, N 1s, C 1s and Ag 3d orbitals. The electron emission angle was  $60^\circ$  and the source-to-analyzer angle was  $60^\circ$ . The binding energy scale of the instrument was calibrated following a Kratos analytical procedure that uses ISO 15472 binding energy data. Spectra were

recorded by setting the instrument to the hybrid lens mode and the slot mode providing approximately a  $300 \times 700 \mu\text{m}^2$  analysis area using charge neutralization. All XPS spectra were processed with the UNIFIT program (version 2017). The highly resolved Ag 3d core level spectra were acquired using a pass energy of 20 eV and fitted with doublets of fixed separation of 6 eV, an area ratio of  $\text{Ag}3d_{5/2} : \text{Ag}3d_{3/2} = 2:1$ , and equal FWHMs for  $\text{Ag}3d_{5/2}$  and  $\text{Ag}3d_{3/2}$ . The FWHM of the Ag3d doublets was fixed for both doublets. For the curve fitting of the high-resolution Ag 3d spectrum a Gaussian/Lorentzian sum function peak shape model was used ( $G/L = 0.27$  constrained) with an asymmetry of  $-0.16$  (constrained) for  $\text{Ag}^0$  and 0 for  $\text{Ag}^+$  (constrained) in combination with a Shirley background. After peak fitting of the C 1s spectra, all the spectra were calibrated in reference to the C–C aliphatic C1s component at a binding energy of 285.0 eV.

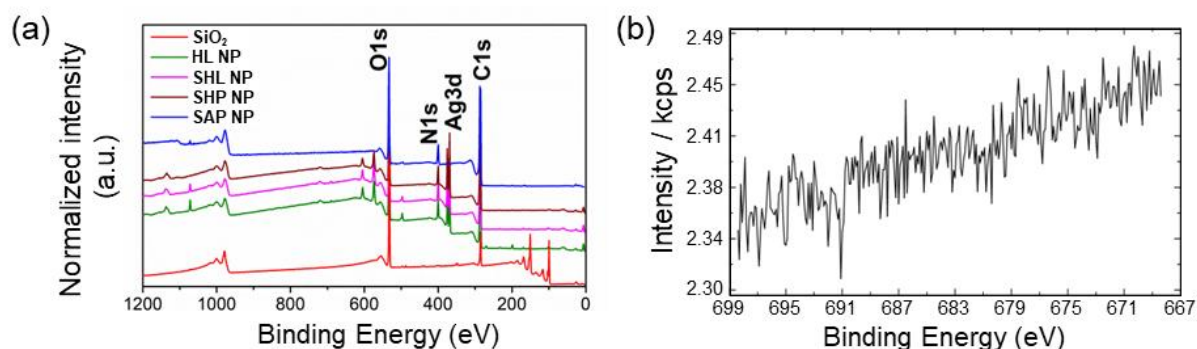

**Figure S1.** XPS survey spectra of SiO<sub>2</sub>, SHL NP, HL NP, SHP NP and SAP NP surfaces (a). Highly-resolved Ag 3d XPS spectra of the substrate of SiO<sub>2</sub> surface (b).

**Table S1. Elemental composition of the polymer-coated surfaces measured by XPS analysis**

| Surface          | Relative molar ratio of element in the analyzed surface layer (at %) |     |      |     |
|------------------|----------------------------------------------------------------------|-----|------|-----|
|                  | C                                                                    | N   | O    | Ag  |
| SiO <sub>2</sub> | 31.1                                                                 | 1.0 | 31.5 | -   |
| SAP NP           | 66                                                                   | 5.6 | 21.6 | 2.9 |
| SHP NP           | 67.1                                                                 | 5.9 | 21.6 | 2.6 |
| SHL NP           | 67                                                                   | 6.6 | 23.7 | 2.6 |
| HL NP            | 66.7                                                                 | 6.7 | 24   | 2.5 |

**Table S2. Interpretation of the fitted components in the highly resolved Ag 3d XPS spectra.**

| Surface | Spectrum | Binding energy | Interpretation | Relat. Area | Abs. Area [cps*eV] |
|---------|----------|----------------|----------------|-------------|--------------------|
| SAP NP  | Ag3d     | 368.2          | Ag (I)         | 0.29        | 5128               |
|         |          | 368.8          | Ag (0)         | 0.71        | 12426              |
| SHP NP  | Ag3d     | 368.5          | Ag (I)         | 0.30        | 4821               |
|         |          | 369.1          | Ag (0)         | 0.70        | 11406              |
| SHL NP  | Ag3d     | 368.5          | Ag (I)         | 0.28        | 4142               |
|         |          | 368.9          | Ag (0)         | 0.72        | 10635              |
| HL NP   | Ag3d     | 368.5          | Ag (I)         | 0.31        | 4755               |
|         |          | 369.0          | Ag (0)         | 0.69        | 10790              |

### 3. Scanning electron microscope (SEM)

The surface morphology of the coatings were analyzed by a field emission scanning electron microscope (FE-SEM, Hitachi SU8030, Japan) at an accelerating voltage of 10 kV, a current of 10  $\mu$ A and a working distance (WD) of around 8.3 mm. The samples were dried under high vacuum and coated with a 8-10 nm gold layer by using a sputter coater (Emscope SC 500, Quorum Technologies, UK) for 20 s at 30 mA, 10-1 Torr (1.3 mbar) in a argon atmosphere.

### 4. Statistics

All data in this study were presented in the mean  $\pm$  SD (Standard Deviation). Independent t-test computing with Origin 9 was used to compare bacteria counts on the different surfaces.

## Notes and references

1. L. Yu, Y. Hou, C. Cheng, C. Schlaich, P.-L. M. Noeske, Q. Wei and R. Haag, *ACS Appl. Mater. Interfaces*, 2017, **9**, 44281-44292.
2. C. Schlaich, L. Yu, L. Cuellar Camacho, Q. Wei and R. Haag, *Polym. Chem.*, 2016, **7**, 7446-7454.
3. L. Yu, C. Cheng, Q. Ran, C. Schlaich, P.-L. M. Noeske, W. Li, Q. Wei and R. Haag, *ACS Appl. Mater. Interfaces*, 2017, **9**, 6624-6633.
